# Supplementary material for: Comparative Mitogenomic Analyses of Hydropsychidae Revealing the Novel Rearrangement of Protein-Coding Gene and tRNA (Trichoptera: Annulipalpia)
Source: MDPI journal article supplement (doi:10.3390/insects13090759), 2022-08-23
Supplement: s1 [file s1]

**Table S1.** Detailed taxonomic resources are used in the present study.

| Subfamily      | Subfamily      | Genus                 | Species                                                         | GenBank accession number |
|----------------|----------------|-----------------------|-----------------------------------------------------------------|--------------------------|
| Ingroup        |                |                       |                                                                 |                          |
| Hydropsychidae | Arctopsychinae | <i>Arctopsyche</i>    | <i>Arctopsyche spinescens</i> Gui & Yang, 2001                  | ON859124                 |
|                |                |                       | <i>Arctopsyche</i> sp.                                          | ON859111                 |
|                |                | <i>Maesaipsyche</i>   | <i>Maesaipsyche stengeli</i> Malicky, 1997*                     | OL677993                 |
|                |                | <i>Parapsyche</i>     | <i>Parapsyche difformis</i> (Banks, 1947)*                      | OL677995                 |
|                |                |                       | <i>Parapsyche elsis</i> Milne, 1936                             | ON859123                 |
|                | Diplectroninae | <i>Diplectrona</i>    | <i>Diplectrona albofasciata</i> (Ulmer, 1913)                   | ON859114                 |
|                |                |                       | <i>Diplectrona hexapetala</i> Sun, 2012*                        | OL678009                 |
|                | Hydropsychinae | <i>Cheumatopsyche</i> | <i>Cheumatopsyche brevilineata</i> (Iwata, 1927)                | ON859112                 |
|                |                |                       | <i>Cheumatopsyche campyla</i> Ross, 1938*                       | NC_036954                |
|                |                |                       | <i>Cheumatopsyche charites</i> Malicky & Chantaramongkol, 1997* | OL678007                 |
|                |                |                       | <i>Cheumatopsyche infascia</i> Martynov, 1934                   | ON859113                 |
|                |                |                       | <i>Cheumatopsyche</i> sp.                                       | ON859125                 |
|                |                | <i>Hydromanicus</i>   | <i>Hydromanicus huapingensis</i> (Li & Tian, 1990)              | ON859115                 |
|                |                |                       | <i>Hydromanicus melli</i> (Ulmer, 1926)*                        | OL678021                 |
|                |                |                       | <i>Hydromanicus wulaianus</i> (Kobayashi, 1987)*                | NC_036156                |
|                |                | <i>Hydropsyche</i>    | <i>Hydropsyche cerva</i> (Li & Tian, 1990)                      | ON859117                 |
|                |                |                       | <i>Hydropsyche columnata</i> Martynov, 1931                     | ON859126                 |
|                |                |                       | <i>Hydropsyche formosana</i> Ulmer, 1911                        | ON859118                 |
|                |                |                       | <i>Hydropsyche fryeri</i> Ulmer, 1915*                          | NC_060325                |
|                |                |                       | <i>Hydropsyche fukienensis</i> Schmid, 1965*                    | OL678022                 |
|                |                |                       | <i>Hydropsyche gautamittra</i> Schmid, 1961                     | ON859119                 |
|                |                |                       | <i>Hydropsyche orris</i> Ross, 1938*                            | NC_036951                |
|                |                |                       | <i>Hydropsyche rhomboana</i> Martynov, 1909                     | ON859120                 |

|                  |                  |                     |                                                         |           |
|------------------|------------------|---------------------|---------------------------------------------------------|-----------|
|                  |                  |                     | <i>Hydropsyche simulans</i> Ross, 1938*                 | NC_036950 |
|                  |                  |                     | <i>Hydropsyche simulata</i> Mosely, 1942                | ON859121  |
|                  |                  |                     | <i>Hydropsyche trifora</i> (Li & Tian, 1990)            | ON859122  |
|                  |                  |                     | <i>Hydropsyche pellucidula</i> (Curtis, 1834)*          | NC_029246 |
|                  |                  |                     | <i>Hydropsyche</i> sp.                                  | ON859116  |
|                  |                  | <i>Potamyia</i>     | <i>Potamyia chinensis</i> (Ulmer, 1915)                 | ON859128  |
|                  |                  |                     | <i>Potamyia horvati</i> Malicky & Chantaramongkol, 1997 | ON859129  |
|                  | Macronematinae   | <i>Macrostemum</i>  | <i>Macrostemum floridum</i> (Navás, 1929)*              | MT677867  |
|                  |                  |                     | <i>Macrostemum radiatum</i> (McLachlan, 1872)           | ON859127  |
| Outgroup         |                  |                     |                                                         |           |
| Philopotamidae   | Chimarrinae      | <i>Chimarra</i>     | <i>Chimarra paramonorum</i> Hu, Sun & Wang, 2018*       | OL678008  |
|                  | Philopotaminae   | <i>Dolophilodes</i> | <i>Dolophilodes bellatula</i> Sun & Malicky, 2002*      | OL678011  |
|                  |                  | <i>Kisaura</i>      | <i>Kisaura zhejiangensis</i> Hu, 2019*                  | OL678025  |
|                  |                  | <i>Wormaldia</i>    | <i>Wormaldia unispina</i> Sun, 1998*                    | OL678056  |
| Stenopsychidae   | Stenopsychinae   | <i>Stenopsyche</i>  | <i>Stenopsyche angustata</i> Martynov, 1930*            | NC_051529 |
|                  |                  |                     | <i>Stenopsyche navasi</i> Ulmer, 1926*                  | OL678052  |
|                  |                  |                     | <i>Stenopsyche tienmushanensis</i> Hwang, 1957*         | MW201980  |
| Psychomyiidae    | Psychomyiinae    | <i>Psychomyia</i>   | <i>Psychomyia kalais</i> Malicky, 2004*                 | OL678047  |
| Xiphocentronidae | Xiphocentroninae | <i>Abaria</i>       | <i>Abaria</i> sp.*                                      | OL677997  |

\* Published mitogenomes of Trichoptera.

**Table S2.** Collection information of the newly sequenced samples.

| Subfamily      | Species                            | Geographical locality      | Longitude   | Latitude   | Elevation (m) | Collection date |
|----------------|------------------------------------|----------------------------|-------------|------------|---------------|-----------------|
| Arctopsychinae | <i>Arctopsyche</i> sp.             | Yunxi, Yunnan, China       | 101°59'59"E | 23°37'1"N  | 1,624         | 13.VII.2021     |
|                | <i>Arctopsyche spinescens</i>      | Menyuan, Qinghai, China    | 101°36'55"E | 37°21'37"N | 2,782         | 30.VI.2021      |
| Diplectroninae | <i>Diplectrona albofasciata</i>    | Mangshan, Hunan, China     | 112°55'39"E | 24°58'48"N | 731           | 02.IX.2020      |
|                | <i>Cheumatopsyche brevilineata</i> | Yueqing, Zhejiang, China   | 120°59'24"E | 28°17'59"N | 64            | 03-13.IV.2019   |
|                | <i>Cheumatopsyche infascia</i>     | Mentougou, Beijing, China  | 115°50'21"E | 40°1'57"N  | 408           | 01.XI.2020      |
|                | <i>Cheumatopsyche</i> sp.          | Nanjing, Jiangsu, China    | 118°50'52"E | 32°2'40"N  | 406           | 05.VI.2021      |
| Hydropsychinae | <i>Hydromanicus huapingensis</i>   | Huanping, Guanxi, China    | 109°54'38"N | 25°36'5"N  | 612           | 19.V.2021       |
|                | <i>Hydropsyche cerva</i>           | Zhaotong, Yunnan, China    | 103°1'28"E  | 26°47'14"N | 738           | 23.XI.2019      |
|                | <i>Hydropsyche columnata</i>       | Zhaotong, Yunnan, China    | 103°1'28"E  | 26°47'14"N | 738           | 23.XI.2019      |
|                | <i>Hydropsyche formosana</i>       | Wuyishan, Fujian, China    | 117°37'17"E | 27°38'53"N | 550           | 16.III.2020     |
|                | <i>Hydropsyche gautamittra</i>     | Pingshan, Sichuan, China   | 103°45'58"E | 28°41'8"N  | 368           | 19.XI.2019      |
|                | <i>Hydropsyche rhomboana</i>       | Qilianshan, Qinghai, China | 101°36'29"E | 37°21'9"N  | 2,786         | 29.VII.2020     |
|                | <i>Hydropsyche simulate</i>        | Shaoyang, Hunan, China     | 110°22'15"E | 26°14'39"N | 559           | 20.V.2021       |
|                | <i>Hydropsyche trifora</i>         | Wuyishan, Fujian, China    | 117°37'17"E | 27°38'53"N | 550           | 16.III.2020     |
|                | <i>Hydropsyche</i> sp.             | Shaoyang, Hunan, China     | 110°22'15"E | 26°14'39"N | 559           | 20.V.2021       |
|                | <i>Potamyia chinensis</i>          | Yueqing, Zhejiang, China   | 120°59'24"E | 28°17'59"N | 64            | 03-13.IV.2019   |
|                | <i>Potamyia horvati</i>            | Lincang, Yunnan, China     | 99°31'45"E  | 23°37'8"N  | 1,085         | 29.III.2020     |
|                | <i>Macrostemum radiatum</i>        | Changde, Hunan, China      | 113°19'24"E | 28°17'59"N | 63            | 03-13.IV.2019   |
| Macronematinae |                                    |                            |             |            |               |                 |

**Table S3.** PCR primers were used to sequence mtCOI genes of Trichoptera in this study.

| Primer  | Sequence                   | Reference         |
|---------|----------------------------|-------------------|
| LCO1490 | GGTCAACAAATCATAAAGATATTGG  | Folmer et al.1994 |
| HCO2198 | TAAACTTCAGGGTGACCAAAAAATCA |                   |

**Table S4.** The length, nucleotide composition, and skewness of novel obtained hydropsychid mitogenomes.

| Species                                                 | length | A+T (%) | AT-Skew | GC-Skew |
|---------------------------------------------------------|--------|---------|---------|---------|
| <i>Arctopsyche spinescens</i> Gui & Yang, 2001          | 16,175 | 79.24   | 0.0492  | -0.3329 |
| <i>Arctopsyche</i> sp.                                  | 15,923 | 81.42   | -0.008  | -0.2592 |
| <i>Parapsyche elsis</i> Milne, 1936                     | 15,931 | 73.09   | 0.0157  | -0.3688 |
| <i>Diplectrone albofasciata</i> (Ulmer, 1913)           | 15,566 | 72.92   | 0.0494  | -0.3716 |
| <i>Cheumatopsyche brevilineata</i> (Iwata, 1927)        | 15,330 | 79.1    | 0.0111  | -0.3315 |
| <i>Cheumatopsyche infascia</i> Martynov, 1934           | 15,275 | 78.99   | 0.0168  | -0.3375 |
| <i>Cheumatopsyche</i> sp.                               | 14,974 | 80.41   | -0.0097 | -0.3003 |
| <i>Hydromanicus huapingensis</i> (Li & Tian, 1990)      | 15,378 | 77.79   | 0.0318  | -0.3511 |
| <i>Hydropsyche cerva</i> (Li & Tian, 1990)              | 17,038 | 80.61   | 0.0195  | -0.2988 |
| <i>Hydropsyche columnata</i> Martynov, 1931             | 15,614 | 80.44   | 0.0226  | -0.2874 |
| <i>Hydropsyche formosana</i> Ulmer, 1911                | 16,139 | 82.35   | 0.0222  | -0.2322 |
| <i>Hydropsyche gautamittra</i> Schmid, 1961             | 15,545 | 81.54   | 0.0086  | -0.2318 |
| <i>Hydropsyche rhomboana</i> Martynov, 1909             | 15,507 | 77.7    | 0.0152  | -0.3169 |
| <i>Hydropsyche simulata</i> Mosely, 1942                | 18,380 | 81.51   | 0.0168  | -0.279  |
| <i>Hydropsyche trifora</i> (Li & Tian, 1990)            | 15,997 | 79.91   | 0.0274  | -0.2941 |
| <i>Hydropsyche</i> sp.                                  | 15,652 | 78.72   | 0.0333  | -0.3129 |
| <i>Potamyia chinensis</i> (Ulmer, 1915)                 | 22,920 | 81.75   | 0.0368  | -0.3808 |
| <i>Potamyia horvati</i> Malicky & Chantaramongkol, 1997 | 27,450 | 85.4    | 0.0012  | -0.3207 |
| <i>Macrostemum radiatum</i> (McLachlan, 1872)           | 15,796 | 78.18   | 0.0098  | -0.415  |

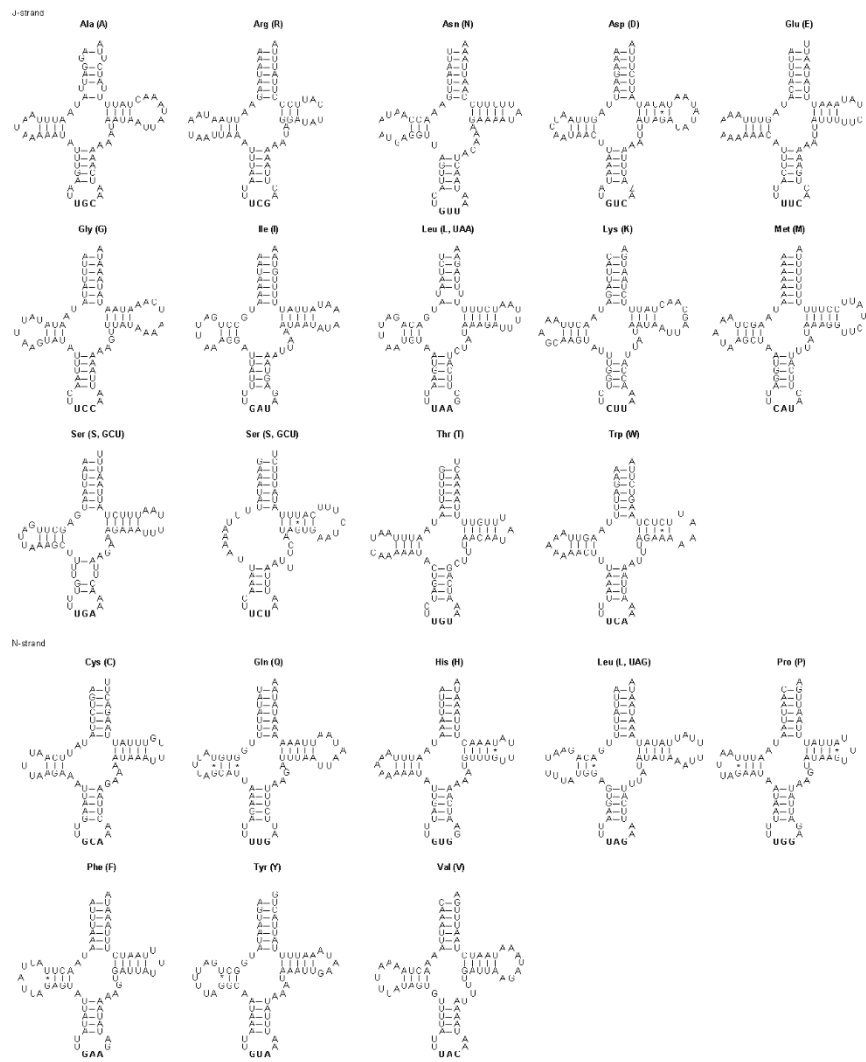

**Figure S1.** Putative secondary structures of the 22 tRNA genes identified in the mitogenome of *Hydropsyche cerva* Li & Tian, 1990.

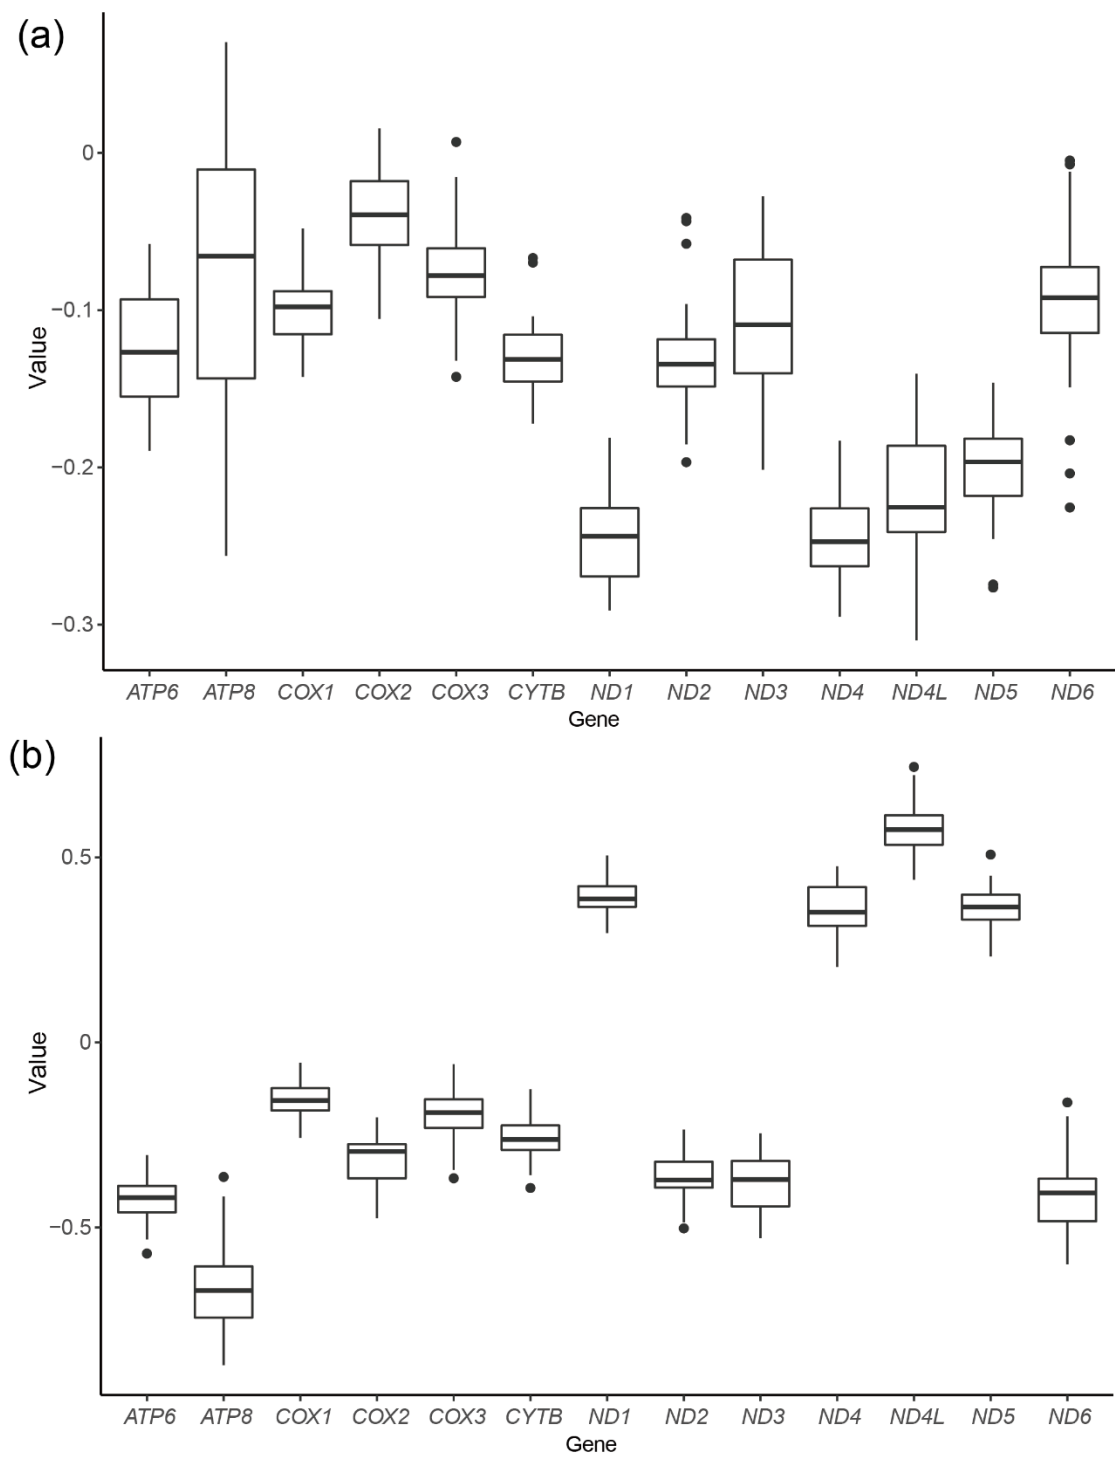

**Figure S2.** Box-and-whisker plots for nucleotide composition of each gene. (a) AT-skew; (b) GC-skew.

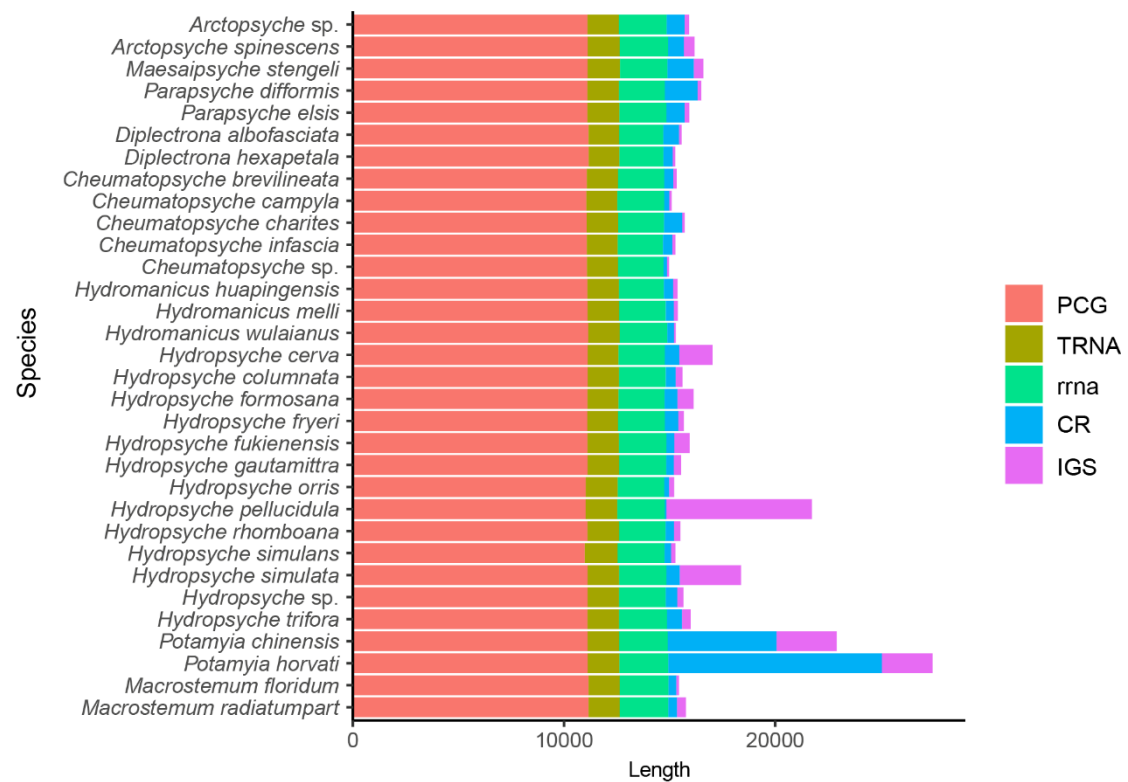

**Figure S3.** The length of protein-coding genes, transfer RNAs, ribosomal RNAs, and control regions among 32 hydropsychid mitogenomes.

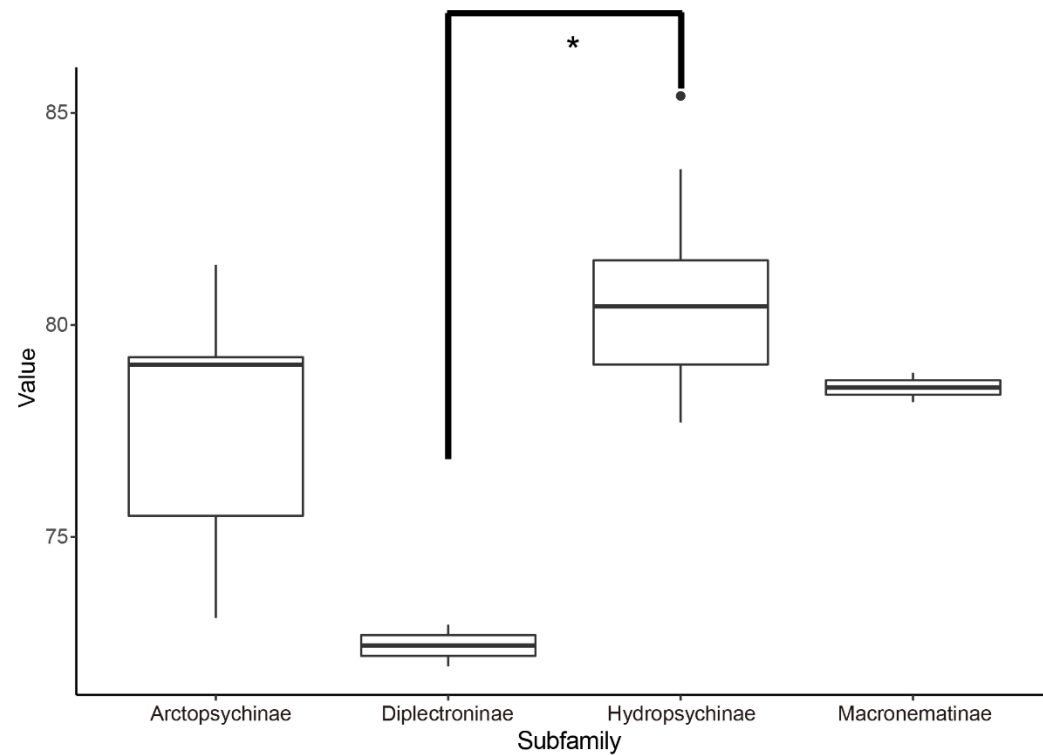

**Figure S4.** A+T content of each subfamily. Asterisks indicate  $p$  values  $\leq 0.05$  (Wilcoxon rank sum test \*).

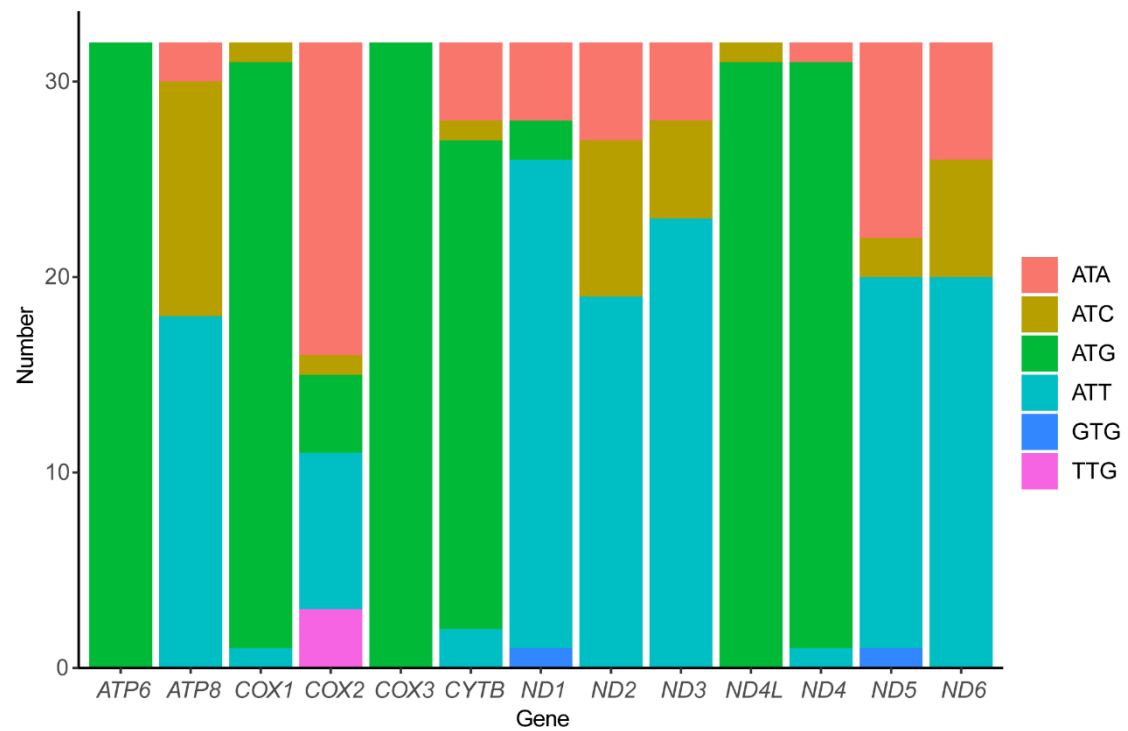

**Figure S5.** Start codons of protein-coding genes among hydropsychid mitogenomes.

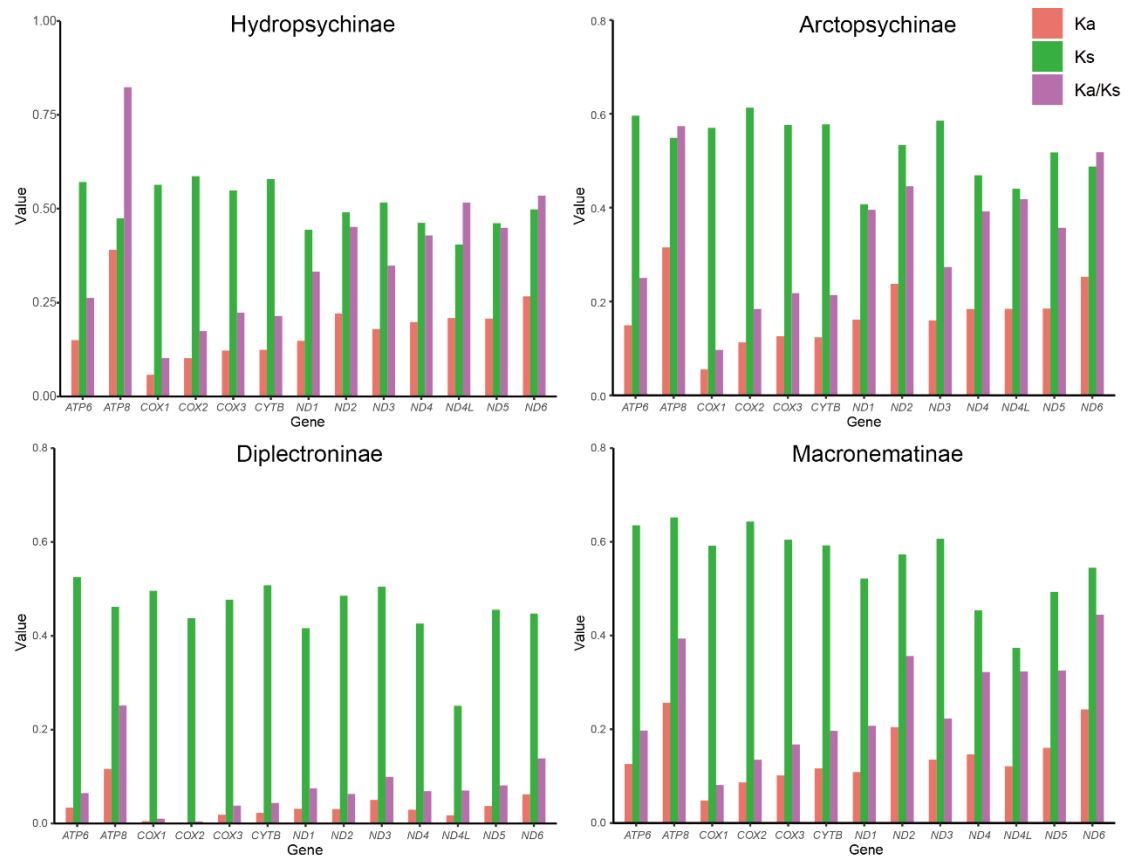

**Figure S6.** Evolution rate of each PCG of the mitogenomes of four subfamilies.



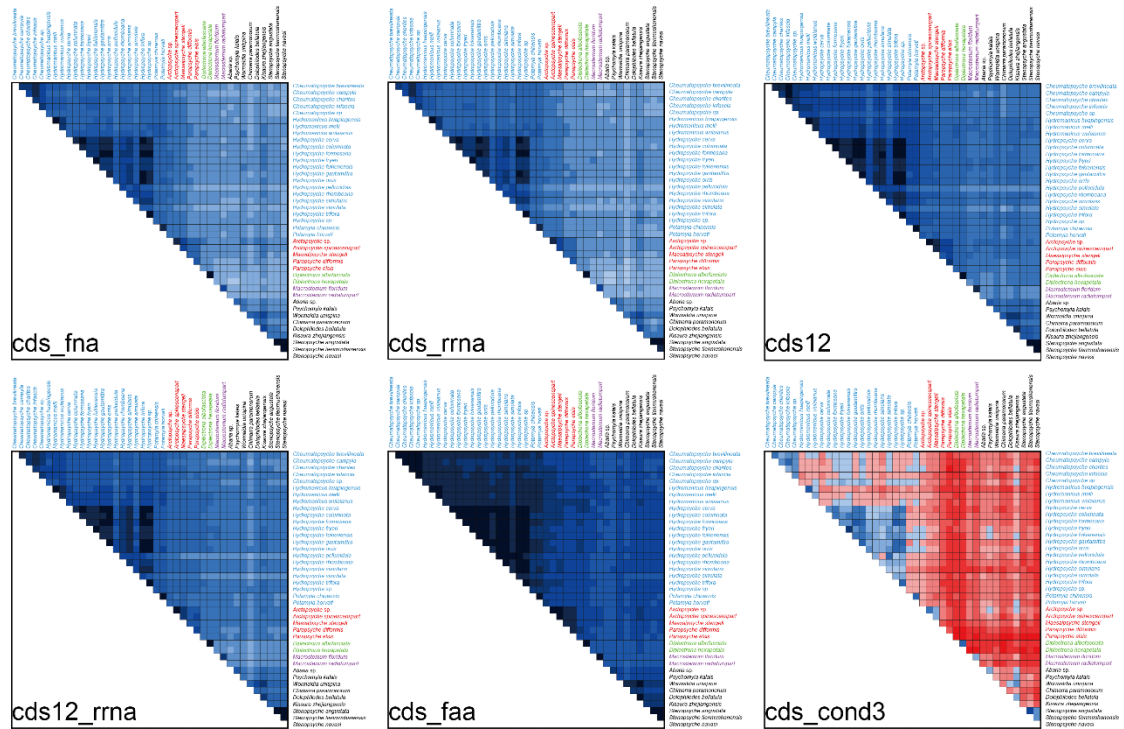

**Figure S7.** Heterogeneity of sequence composition of mitochondrial genomes for different datasets. The pairwise Aliscore values are represented by colored squares. The scores range from  $-1$ , indicating full random similarity (dark blue), to  $+1$ , indicating non-random similarity (bright orange).

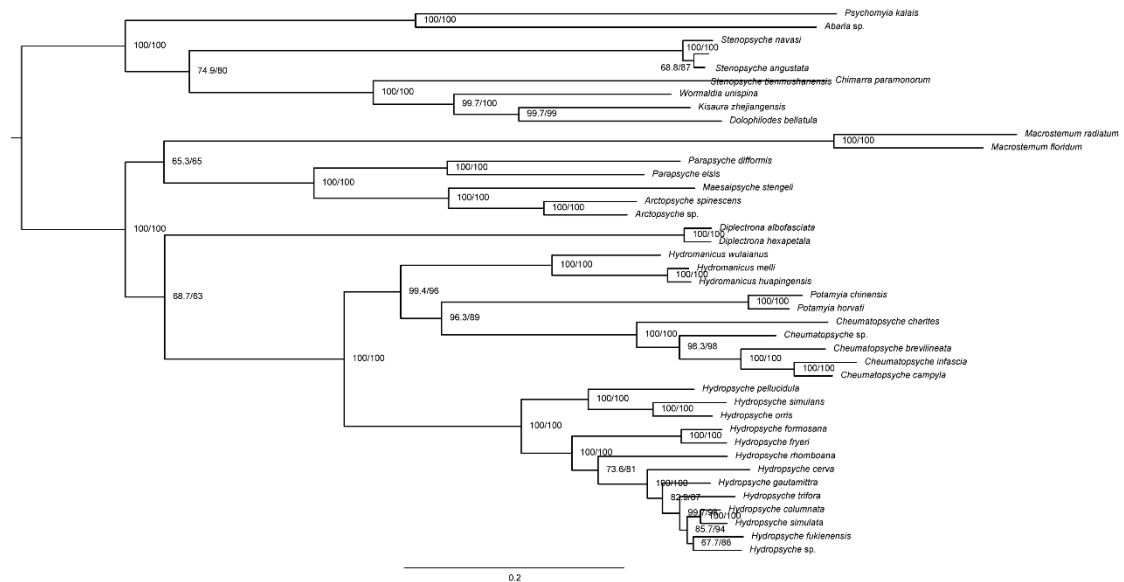

**Figure S8.** ML phylogenomic tree of Hydropsychidae based on the analysis of PCG\_faa dataset with PMSF model in IQ-TREE. Node values represent SH-aLRT and UFBoot2, respectively.

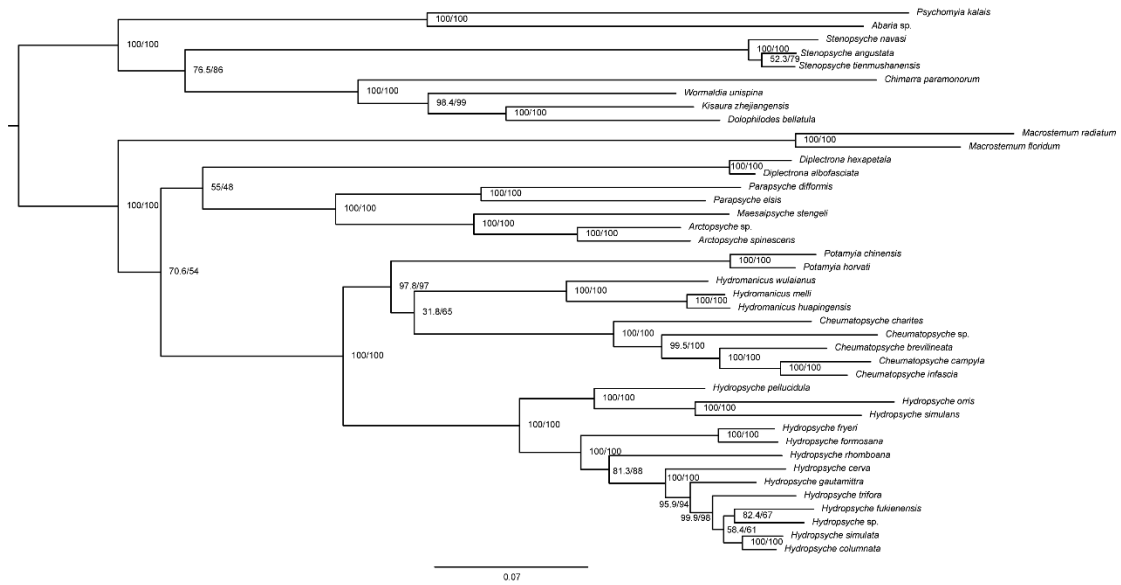

**Figure S9.** ML phylogenomic tree of Hydropsychidae based on the analysis of PCG12\_fna dataset with partitioning model in IQ-TREE. Node values represent SH-aLRT and UFBoot2, respectively.

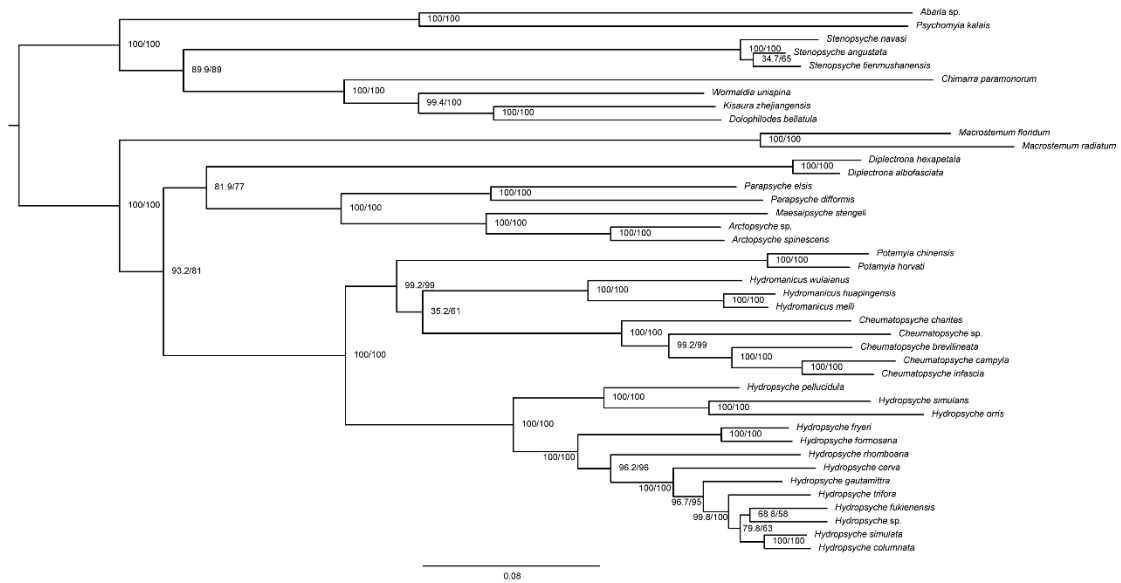

**Figure S10.** ML phylogenomic tree of Hydropsychidae based on the analysis of PCG12\_rna dataset with partitioning model in IQ-TREE. Node values represent SH-aLRT and UFBoot2, respectively.
